# Supplementary material
Source: Elsevier journal article supplement (https://www.sciencedirect.com/science/article/pii/S2173580820300018)
Supplement: mmc1 [file S2173580820300018:mmc1.docx]

**Material suplementario**

**Tabla S1.-**

| **N = 26** | **Hombres** | | **< 65 años** | | | **< Primaria** | |
| --- | --- | --- | --- | --- | --- | --- | --- |
| **Fototest** | **Denominación** | | **Rec. Libre*** | **Rec. Total** | | **Nombres** |
| **Media±de** | 32.6±3.4 | 5.9±0.2 | | 8.2±1.6 | 9.8±0.9 | | 16.8±3.4 |
| **-1.0z** | 28-29 | - | | - | 9 | | 13 |
| **-1.5z** | 27 | - | | 6 | - | | 11-12 |
| **-2.0z** | ≤ 26 | ≤ 5 | | 0,2,4 | ≤ 8 | | ≤ 10 |
| **P5** | 0-28 | 0-5 | | 0,2,4,6 | 0-8 | | 0-12 |
| **P10** | 29 | - | | - | 9 | | 13 |
| **P15** | - | - | | - | - | | - |
| **P20** | - | - | | 8 | - | | - |
| **P25** | 30 | - | | - | - | | 14 |
| **P30** | - | - | | - | - | | 15 |
| **P35** | 31 | - | | - | - | | - |
| **P40** | 32 | - | | - | - | | 16 |
| **P45** | - | - | | - | 10 | | - |
| **P50** | - | - | | - | - | | 17 |
| **P55** | 33 | - | | - | - | | - |
| **P60** | - | 6 | | - | - | | - |
| **P65** | 34 | - | | - | - | | - |
| **P70** | - | - | | - | - | | 18 |
| **P75** | - | - | | - | - | | - |
| **P80** | 35 | - | | - | - | | 19-20 |
| **P85** | - | - | | 10 | 11 | | - |
| **P90** | 36-40 | - | | - | - | | 21-25 |
| **P95** | ≥ 41 | - | | 12 | 12 | | 26 |

* Sólo son posibles los valores 0,2,4,6,8,10 y 12

**Tabla S2.-**

| **N = 49** | **Hombres** | | **< 65 años** | | | **Primaria** | |
| --- | --- | --- | --- | --- | --- | --- | --- |
| **Fototest** | **Denominación** | | **Rec. Libre*** | **Rec. Total** | | **Nombres** |
| **Media±de** | 34.4±4.2 | 5.9±0.2 | | 8.7±2.2 | 10.0±1.7 | | 18.4±3.7 |
| **-1.0z** | 29-30 | - | | 6 | 8 | | 14-15 |
| **-1.5z** | 27-28 | - | | - | - | | 12-13 |
| **-2.0z** | ≤ 26 | ≤ 5 | | 0,2,4 | ≤ 7 | | ≤ 11 |
| **P5** | 0-28 | 0-5 | | 0,2,4 | 0-7 | | 0-12 |
| **P10** | 29 | - | | 6 | - | | 13 |
| **P15** | 30 | - | | - | 8 | | 14-15 |
| **P20** | - | - | | - | 9 | | 16 |
| **P25** | 31 | - | | 8 | - | | - |
| **P30** | 32 | - | | - | 10 | | - |
| **P35** | - | - | | - | - | | - |
| **P40** | 33 | - | | - | - | | 17 |
| **P45** | - | - | | - | - | | - |
| **P50** | 34 | 6 | | - | - | | 18 |
| **P55** | 35 | - | | 10 | 11 | | - |
| **P60** | 36 | - | | - | - | | 19 |
| **P65** | - | - | | - | - | | 20 |
| **P70** | 37 | - | | - | - | | 21 |
| **P75** | - | - | | - | - | | 22-23 |
| **P80** | 38-39 | - | | - | - | | - |
| **P85** | - | - | | 12 | 12 | | - |
| **P90** | 40-41 | - | | - | - | | 24 |
| **P95** | ≥ 42 | - | | - | - | | ≥ 25 |

* Sólo son posibles los valores 0,2,4,6,8,10 y 12

**Tabla S3.-**

| **N = 85** | **Hombres** | | **< 65 años** | | | **> Primaria** | |
| --- | --- | --- | --- | --- | --- | --- | --- |
| **Fototest** | **Denominación** | | **Rec. Libre*** | **Rec. Total** | | **Nombres** |
| **Media±de** | 37.8±5.1 | 6.0±0.0 | | 9.3±2.0 | 10.4±1.3 | | 21.3±4.6 |
| **-1.0z** | 31-33 | - | | - | 9 | | 15-17 |
| **-1.5z** | 29-30 | - | | 6 | - | | 13-14 |
| **-2.0z** | ≤ 28 | ≤ 5 | | 0,2,4 | ≤ 8 | | ≤ 12 |
| **P5** | 0-28 | 0-5 | | 0,2,4,6 | 0-8 | | 0-14 |
| **P10** | 29-31 | - | | - | 9 | | 15 |
| **P15** | 32 | - | | 8 | - | | 16 |
| **P20** | 33 | - | | - | - | | 17 |
| **P25** | 34 | - | | - | 10 | | 18 |
| **P30** | 35 | - | | - | - | | - |
| **P35** | 36 | - | | - | - | | 19 |
| **P40** | 33 | - | | - | - | | 20 |
| **P45** | 37 | - | | - | - | | 21 |
| **P50** | 38 | 6 | | 10 | 11 | | 22 |
| **P55** | 39 | - | | - | - | | - |
| **P60** | - | - | | - | - | | 23 |
| **P65** | 40 | - | | - | - | | - |
| **P70** | - | - | | - | - | | 24 |
| **P75** | 41-42 | - | | 12 | 12 | | 25 |
| **P80** | 43 | - | | - | - | | 26 |
| **P85** | - | - | | - | - | | - |
| **P90** | 44-45 | - | | - | - | | 27-28 |
| **P95** | ≥ 46 | - | | - | - | | ≥ 29 |

* Sólo son posibles los valores 0,2,4,6,8,10 y 12
**Tabla S4.-**

| **N = 114** | **Hombres** | | **> 65 años** | | | **< Primaria** | |
| --- | --- | --- | --- | --- | --- | --- | --- |
| **Fototest** | **Denominación** | | **Rec. Libre*** | **Rec. Total** | | **Nombres** |
| **Media±de** | 31.1±4.1 | 5.9±0.3 | | 8.1±2.1 | 9.7±1.5 | | 15.5±3.9 |
| **-1.0z** | 26-27 | - | | 6 | 8 | | 11-12 |
| **-1.5z** | 24-25 | ≤ 5 | | - | - | | 9-10 |
| **-2.0z** | ≤ 23 | - | | 0,2,4 | ≤ 7 | | ≤ 8 |
| **P5** | 0-25 | 0-5 | | 0,2,4 | 0-7 | | 0-10 |
| **P10** | 26 | - | | - | 8 | | 11 |
| **P15** | 27 | - | | 6 | - | | 12 |
| **P20** | 28 | - | | - | 9 | | 13 |
| **P25** | - | - | | 8 | - | | - |
| **P30** | 29 | - | | - | - | | - |
| **P35** | - | - | | - | 10 | | 14 |
| **P40** | 30 | - | | - | - | | - |
| **P45** | - | - | | - | - | | 15 |
| **P50** | 31 | 6 | | - | - | | - |
| **P55** | - | - | | - | - | | - |
| **P60** | 32 | - | | - | - | | 16 |
| **P65** | - | - | | - | - | | 17 |
| **P70** | 33 | - | | 10 | - | | - |
| **P75** | 34-35 | - | | - | 11 | | 18 |
| **P80** | - | - | | - | - | | 19 |
| **P85** | 36-38 | - | | - | - | | 20 |
| **P90** | - | - | | - | - | | 21-22 |
| **P95** | ≥ 39 | - | | 12 | 12 | | ≥ 23 |

* Sólo son posibles los valores 0,2,4,6,8,10 y 12

**Tabla S5.-**

| **N = 84** | **Hombres** | | **> 65 años** | | | **Primaria** | |
| --- | --- | --- | --- | --- | --- | --- | --- |
| **Fototest** | **Denominación** | | **Rec. Libre*** | **Rec. Total** | | **Nombres** |
| **Media±de** | 32.6±4.4 | 5.9±0.4 | | 8.1±2.3 | 9.7±1.5 | | 16.9±3.9 |
| **-1.0z** | 27-28 | - | | 6 | 8 | | 12-13 |
| **-1.5z** | 25-26 | ≤ 5 | | - | - | | 10-11 |
| **-2.0z** | ≤ 24 | - | | 0,2 4 | ≤ 7 | | ≤ 9 |
| **P5** | 0-25 | 0-5 | | 0,2,4 | 0-7 | | 0-10 |
| **P10** | 26-27 | - | | 6 | 8 | | 11-12 |
| **P15** | 28-29 | - | | - | - | | 13 |
| **P20** | - | - | | - | - | | 14 |
| **P25** | 30 | - | | - | 9 | | - |
| **P30** | - | - | | - | - | | 15 |
| **P35** | 31 | - | | - | - | | - |
| **P40** | - | - | | 8 | 10 | | 16 |
| **P45** | 32 | - | | - | - | | - |
| **P50** | 33 | 6 | | - | - | | 17 |
| **P55** | - | - | | - | - | | 18 |
| **P60** | 34 | - | | 10 | - | | - |
| **P65** | - | - | | - | 11 | | - |
| **P70** | 35 | - | | - | - | | - |
| **P75** | 36-37 | - | | - | - | | 19 |
| **P80** | - | - | | - | - | | 20 |
| **P85** | - | - | | - | - | | - |
| **P90** | 38 | - | | - | - | | 21-24 |
| **P95** | ≥ 39 | - | | 12 | 12 | | ≥ 25 |

* Sólo son posibles los valores 0,2,4,6,8,10 y 12

**Tabla S6.-**

| **N = 71** | **Hombres** | | **> 65 años** | | | **> Primaria** | |
| --- | --- | --- | --- | --- | --- | --- | --- |
| **Fototest** | **Denominación** | | **Rec. Libre*** | **Rec. Total** | | **Nombres** |
| **Media±de** | 35.5±5.2 | 5.9±0.3 | | 8.2±2.6 | 9.7±1.6 | | 19.9±4.7 |
| **-1.0z** | 29-30 | - | | 6 | 8 | | 14-15 |
| **-1.5z** | 26-28 | ≤ 5 | | 4 | 7 | | 11-13 |
| **-2.0z** | ≤ 25 | - | | 0,2 | ≤ 6 | | ≤ 10 |
| **P5** | 0-28 | 0-5 | | 0,2,4 | 0-7 | | 0-14 |
| **P10** | 29-30 | - | | 6 | - | | 15 |
| **P15** | 31 | - | | - | 8 | | - |
| **P20** | - | - | | - | 9 | | 16 |
| **P25** | 32 | - | | - | - | | - |
| **P30** | 33 | - | | 8 | - | | 17-18 |
| **P35** | - | - | | - | 10 | | - |
| **P40** | 34 | - | | - | - | | 19 |
| **P45** | 35 | - | | - | - | | - |
| **P50** | - | 6 | | - | - | | - |
| **P55** | 36 | - | | 10 | - | | 20 |
| **P60** | - | - | | - | - | | - |
| **P65** | 37 | - | | - | 11 | | 21 |
| **P70** | 38 | - | | - | - | | - |
| **P75** | - | - | | - | - | | 22 |
| **P80** | 39 | - | | - | - | | 23 |
| **P85** | 40 | - | | - | - | | 24-27 |
| **P90** | 41-46 | - | | 12 | 12 | | 28-29 |
| **P95** | ≥ 47 | - | | - | - | | ≥ 30 |

* Sólo son posibles los valores 0,2,4,6,8,10 y 12

**Tabla S7.-**

| **N = 54** | **Mujeres** | | **< 65 años** | | | **< Primaria** | |
| --- | --- | --- | --- | --- | --- | --- | --- |
| **Fototest** | **Denominación** | | **Rec. Libre*** | **Rec. Total** | | **Nombres** |
| **Media±de** | 33.2±4.0 | 5.8±0.4 | | 8.9±1.9 | 10.2±1.3 | | 17.2±3.2 |
| **-1.0z** | 28-29 | - | | - | 9 | | 13-14 |
| **-1.5z** | 26-27 | - | | 6 | - | | 12 |
| **-2.0z** | ≤ 25 | ≤ 5 | | 0,2,4 | ≤ 8 | | ≤ 11 |
| **P5** | 0-27 | 0-5 | | 0,2,4,6 | 0-8 | | 0-12 |
| **P10** | 28-29 | - | | - | - | | 13-14 |
| **P15** | 30 | - | | 8 | 9 | | 15 |
| **P20** | 31 | - | | - | - | | 16 |
| **P25** | - | - | | - | - | | - |
| **P30** | - | - | | - | 10 | | - |
| **P35** | - | - | | - | - | | - |
| **P40** | 32 | - | | - | - | | - |
| **P45** | - | - | | - | - | | 17 |
| **P50** | 33 | 6 | | - | - | | - |
| **P55** | - | - | | - | - | | 18 |
| **P60** | 34 | - | | 10 | - | | - |
| **P65** | 35 | - | | - | 11 | | - |
| **P70** | - | - | | - | - | | - |
| **P75** | - | - | | - | - | | 19 |
| **P80** | 36 | - | | - | - | | - |
| **P85** | 37 | - | | 12 | 12 | | - |
| **P90** | 38-41 | - | | - | - | | 20-23 |
| **P95** | ≥ 42 | - | | - | - | | ≥ 24 |

* Sólo son posibles los valores 0,2,4,6,8,10 y 12

**Tabla S8.-**

| **N = 77** | **Mujeres** | | **< 65 años** | | | **Primaria** | |
| --- | --- | --- | --- | --- | --- | --- | --- |
| **Fototest** | **Denominación** | | **Rec. Libre*** | **Rec. Total** | | **Nombres** |
| **Media±de** | 36.4±5.2 | 5.9±0.3 | | 9.0±2.0 | 10.3±1.3 | | 20.3±4.6 |
| **-1.0z** | 30-31 | - | | - | 9 | | 14-16 |
| **-1.5z** | 27-29 | ≤ 5 | | 6 | ≤ 8 | | 12-13 |
| **-2.0z** | ≤ 26 | - | | 0,2,4 | - | | ≤ 11 |
| **P5** | 0-29 | 0-5 | | 0,2,4,6 | 0-8 | | 0-14 |
| **P10** | 30-31 | - | | - | 9 | | 15 |
| **P15** | 32 | - | | - | - | | 16 |
| **P20** | - | - | | 8 | - | | - |
| **P25** | 33 | - | | - | - | | - |
| **P30** | - | - | | - | 10 | | 17 |
| **P35** | 34 | - | | - | - | | 18 |
| **P40** | - | - | | - | - | | - |
| **P45** | 35 | - | | - | - | | 19 |
| **P50** | 36 | 6 | | 10 | - | | - |
| **P55** | 37 | - | | - | 11 | | 20 |
| **P60** | 38 | - | | - | - | | 21 |
| **P65** | - | - | | - | - | | - |
| **P70** | - | - | | - | - | | 22 |
| **P75** | 39-40 | - | | - | - | | 23 |
| **P80** | 41 | - | | - | - | | 24 |
| **P85** | 42-43 | - | | 12 | 12 | | 25-26 |
| **P90** | 44-46 | - | | - | - | | 27-28 |
| **P95** | ≥ 47 | - | | - | - | | ≥ 29 |

* Sólo son posibles los valores 0,2,4,6,8,10 y 12

**Tabla S9.-**

| **N = 97** | **Mujeres** | | **< 65 años** | | | **> Primaria** | |
| --- | --- | --- | --- | --- | --- | --- | --- |
| **Fototest** | **Denominación** | | **Rec. Libre*** | **Rec. Total** | | **Nombres** |
| **Media±de** | 40.8±5.6 | 5.9±0.1 | | 9.4±1.9 | 10.4±1.3 | | 24.4±5.2 |
| **-1.0z** | 33-35 | - | | - | 9 | | 18-19 |
| **-1.5z** | 31-32 | - | | 0,2,4,6 | ≤ 8 | | 15-17 |
| **-2.0z** | ≤ 30 | ≤ 5 | | - | - | | ≤ 14 |
| **P5** | 0-34 | 0-5 | | 0,2,4,6 | 0-8 | | 0-17 |
| **P10** | 35 | - | | - | 9 | | 18 |
| **P15** | - | - | | 8 | - | | 19 |
| **P20** | 36 | - | | - | - | | 20 |
| **P25** | 37 | - | | - | 10 | | 21 |
| **P30** | - | - | | - | - | | - |
| **P35** | 38 | - | | - | - | | 22 |
| **P40** | 39 | - | | 10 | - | | - |
| **P45** | - | - | | - | 11 | | 23 |
| **P50** | - | 6 | | - | - | | 24 |
| **P55** | 40 | - | | - | - | | - |
| **P60** | 41 | - | | - | - | | 25 |
| **P65** | 42 | - | | - | - | | - |
| **P70** | 43 | - | | - | - | | 26-27 |
| **P75** | 44-45 | - | | - | - | | 28 |
| **P80** | 46-47 | - | | - | - | | 29 |
| **P85** | 48-51 | - | | 12 | 12 | | 30 |
| **P90** | - | - | | - | - | | 31-34 |
| **P95** | ≥ 52 | - | | - | - | | ≥ 35 |

* Sólo son posibles los valores 0,2,4,6,8,10 y 12

**Tabla S10.-**

| **N = 178** | **Mujeres** | | **> 65 años** | | | **< Primaria** | |
| --- | --- | --- | --- | --- | --- | --- | --- |
| **Fototest** | **Denominación** | | **Rec. Libre*** | **Rec. Total** | | **Nombres** |
| **Media±de** | 32.3±4.4 | 5.8±0.4 | | 8.2±2.4 | 9.7±1.8 | | 16.8±3.8 |
| **-1.0z** | 27-28 | - | | 6 | 8 | | 12-13 |
| **-1.5z** | 25-26 | - | | - | 7 | | 10-11 |
| **-2.0z** | ≤ 24 | ≤ 5 | | 0,2,4 | ≤ 6 | | ≤ 9 |
| **P5** | 0-25 | 0-5 | | 0,2,4 | 0-6 | | 0-10 |
| **P10** | 26 | - | | 6 | 7 | | 11-12 |
| **P15** | 27 | - | | - | 8 | | 13 |
| **P20** | 28 | - | | - | - | | 14 |
| **P25** | 29 | - | | - | 9 | | - |
| **P30** | 30 | - | | 8 | - | | 15 |
| **P35** | 31 | - | | - | - | | - |
| **P40** | 32 | - | | - | 10 | | 16 |
| **P45** | - | - | | - | - | | - |
| **P50** | - | 6 | | - | - | | 17 |
| **P55** | 33 | - | | - | - | | - |
| **P60** | 34 | - | | - | - | | 18 |
| **P65** | - | - | | 10 | 11 | | - |
| **P70** | - | - | | - | - | | 19 |
| **P75** | 3-5 | - | | - | - | | - |
| **P80** | 36 | - | | - | - | | 20 |
| **P85** | - | - | | - | - | | - |
| **P90** | 37-38 | - | | 12 | 12 | | 21-22 |
| **P95** | ≥ 39 | - | | - | - | | ≥ 23 |

* Sólo son posibles los valores 0,2,4,6,8,10 y 12

**Tabla S11.-**

| **N = 105** | **Mujeres** | | **> 65 años** | | | **Primaria** | |
| --- | --- | --- | --- | --- | --- | --- | --- |
| **Fototest** | **Denominación** | | **Rec. Libre*** | **Rec. Total** | | **Nombres** |
| **Media±de** | 33.9±3.9 | 5.8±0.4 | | 8.3±2.1 | 9.8±1.5 | | 18.2±3.4 |
| **-1.0z** | 29-30 | - | | 6 | 8 | | 14-15 |
| **-1.5z** | 27-28 | - | | - | - | | 12-13 |
| **-2.0z** | ≤ 26 | ≤ 5 | | 0,2,4 | ≤ 7 | | ≤ 11 |
| **P5** | 0-27 | 0-5 | | 0,2,4 | 0-6 | | 0-13 |
| **P10** | 28-29 | - | | - | 7 | | 14-15 |
| **P15** | 30 | - | | 6 | 8 | | - |
| **P20** | 31 | - | | - | 9 | | - |
| **P25** | - | - | | 8 | - | | 16 |
| **P30** | 32 | - | | - | 10 | | - |
| **P35** | - | - | | - | - | | 17 |
| **P40** | 33 | - | | - | - | | - |
| **P45** | - | - | | - | - | | - |
| **P50** | 34 | 6 | | - | - | | 18 |
| **P55** | - | - | | - | - | | - |
| **P60** | 35 | - | | 10 | - | | 19 |
| **P65** | - | - | | - | 11 | | - |
| **P70** | 36 | - | | - | - | | 20 |
| **P75** | - | - | | - | - | | - |
| **P80** | 37 | - | | - | - | | 21 |
| **P85** | 38 | - | | - | - | | - |
| **P90** | 39-40 | - | | - | - | | 22-24 |
| **P95** | ≥ 41 | - | | - | - | | ≥ 25 |

* Sólo son posibles los valores 0,2,4,6,8,10 y 12

**Tabla S12.-**

| **N = 61** | **Mujeres** | | **> 65 años** | | | **> Primaria** | |
| --- | --- | --- | --- | --- | --- | --- | --- |
| **Fototest** | **Denominación** | | **Rec. Libre*** | **Rec. Total** | | **Nombres** |
| **Media±de** | 36.0±5.1 | 5.9±0.3 | | 8.7±2.5 | 9.9±1.7 | | 20.2±4.8 |
| **-1.0z** | 29-31 | - | | 6 | 8 | | 14-15 |
| **-1.5z** | 27-28 | - | | - | 7 | | 12-13 |
| **-2.0z** | ≤ 26 | ≤ 5 | | 0,2,4 | ≤ 6 | | ≤ 11 |
| **P5** | 0-29 | 0-5 | | 0,2,4 | 0-6 | | 0-12 |
| **P10** | 30 | - | | - | 7-8 | | 13-14 |
| **P15** | - | - | | 6 | 9 | | 15 |
| **P20** | 31 | - | | 8 | - | | 16 |
| **P25** | 32 | - | | - | - | | 17 |
| **P30** | 33 | - | | - | 10 | | 18 |
| **P35** | 34 | - | | - | - | | - |
| **P40** | - | - | | - | - | | 19 |
| **P45** | 35 | - | | 10 | - | | - |
| **P50** | - | 6 | | - | - | | - |
| **P55** | 36 | - | | - | 11 | | 20 |
| **P60** | 37 | - | | - | - | | 21 |
| **P65** | 38 | - | | - | - | | - |
| **P70** | - | - | | - | - | | 22 |
| **P75** | 39-40 | - | | - | - | | 23 |
| **P80** | 41-42 | - | | - | - | | 24 |
| **P85** | 43 | - | | - | - | | 25-26 |
| **P90** | 44-45 | - | | 12 | 12 | | 27-29 |
| **P95** | ≥ 46 | - | | - | - | | ≥ 30 |

* Sólo son posibles los valores 0,2,4,6,8,10 y 12
